# Supplementary material
Source: publisher figshare collection journal article supplement (https://springernature.figshare.com/ndownloader/files/25961552)
Supplement: Supplementary file 1 [file 25961552]

### Additional file 1


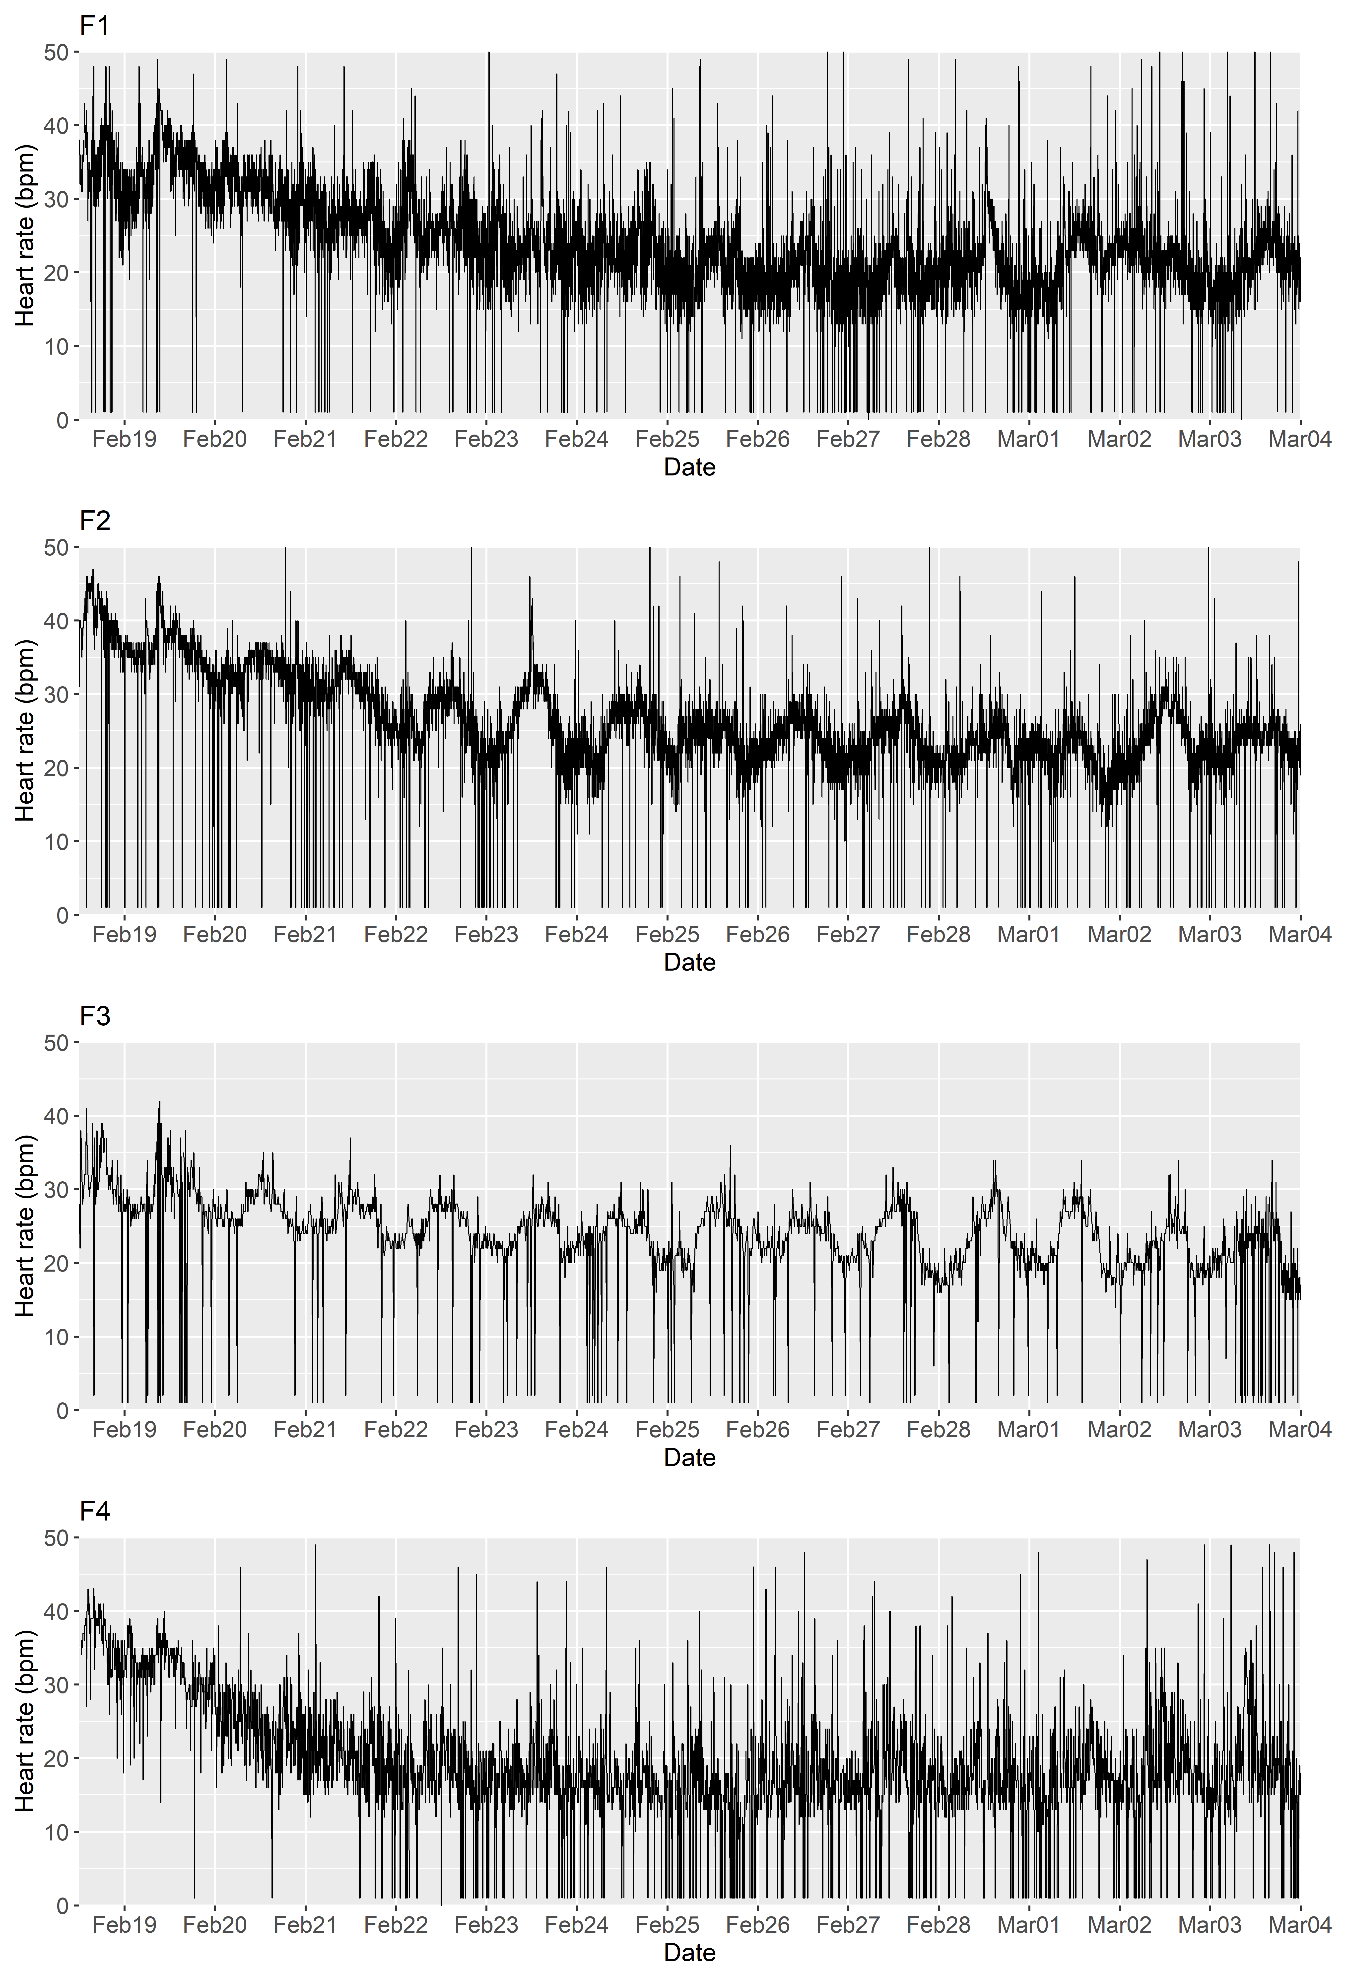


Figure S1: Measured heart rate for Tag IDs F1-F4. The y-axis upper limit has been constrained to 50 bpm.


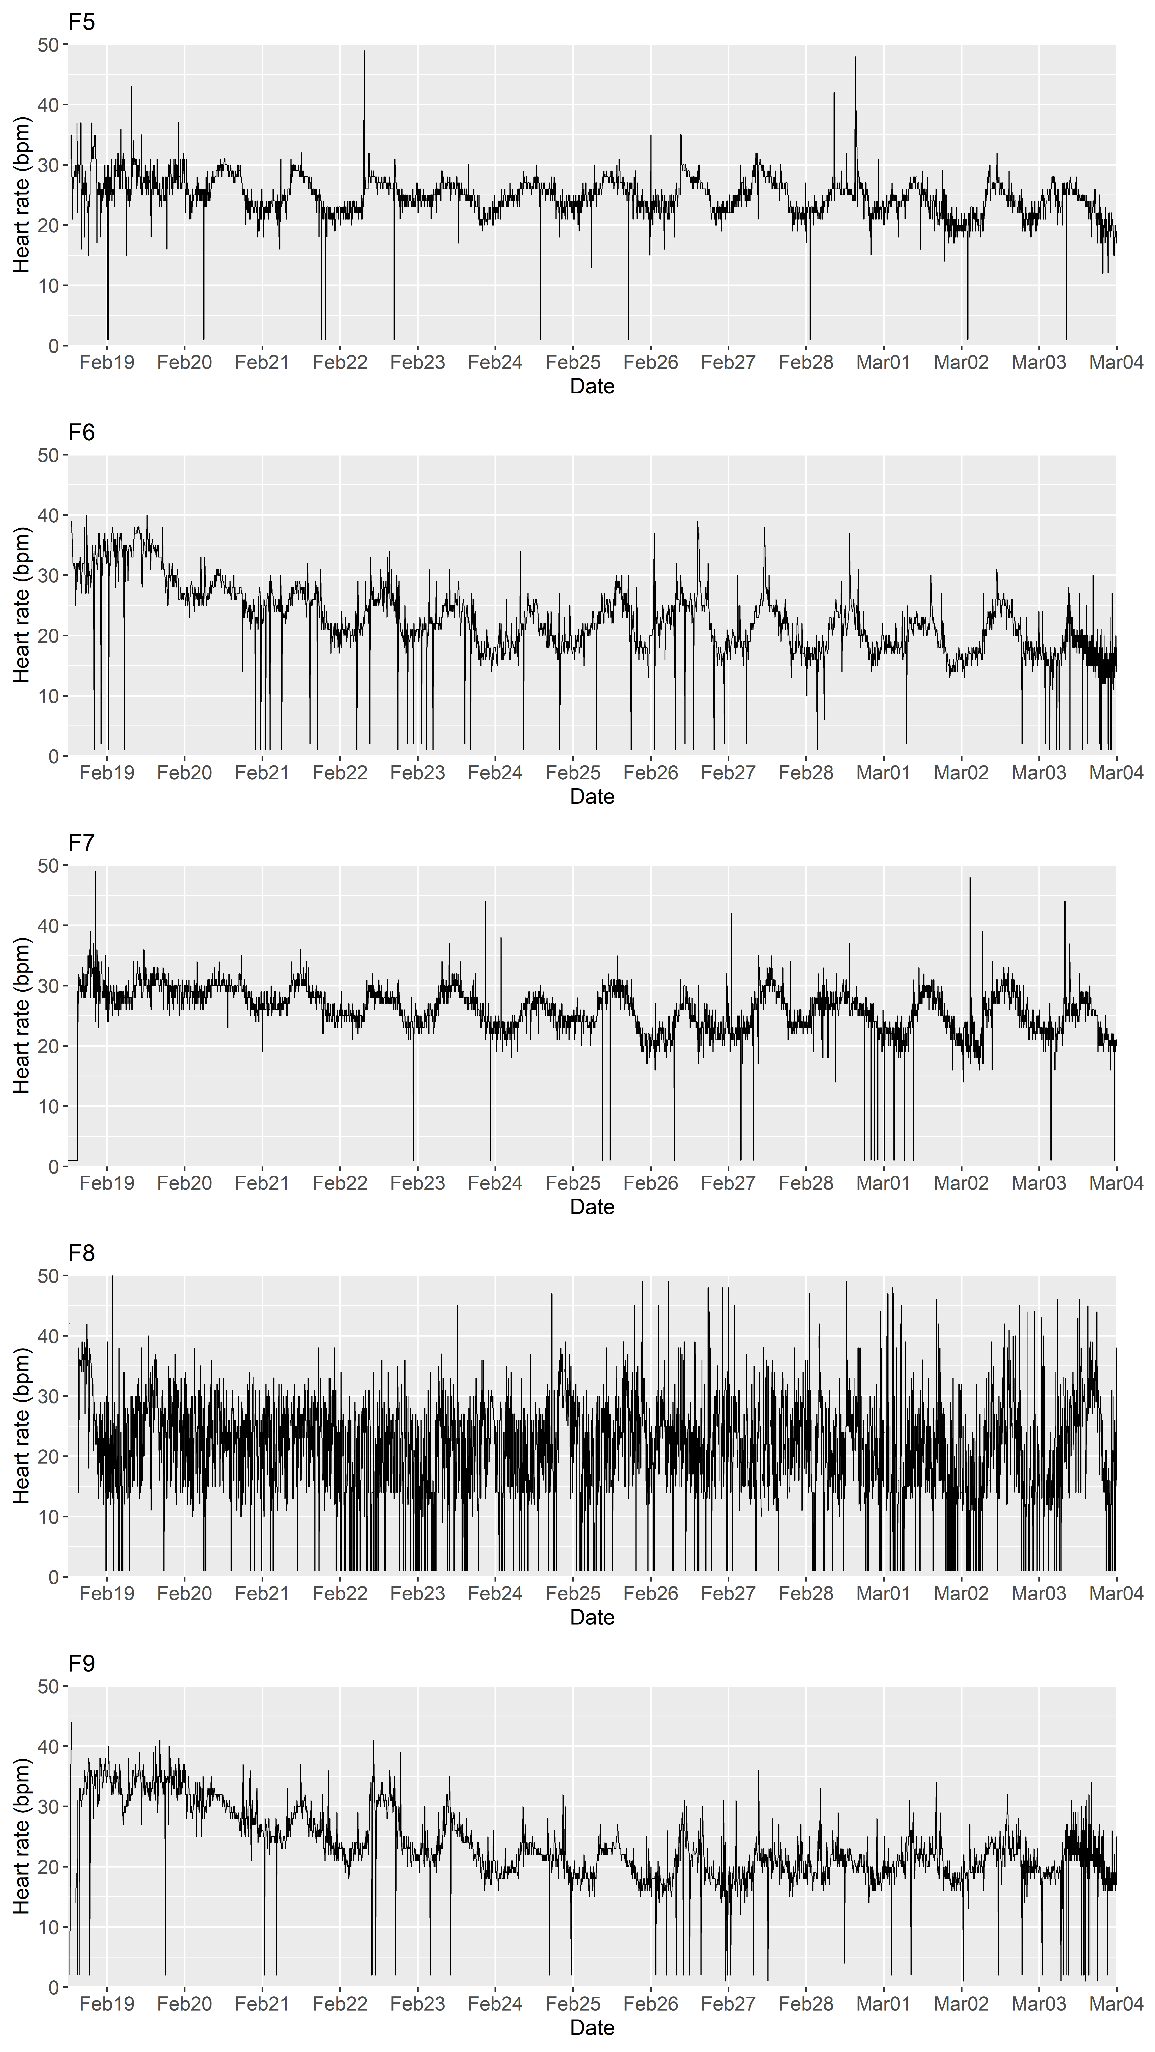


Figure S2: Measured heart rate for Tag IDs F5-F9. The y-axis upper limit has been constrained to 50 bpm.


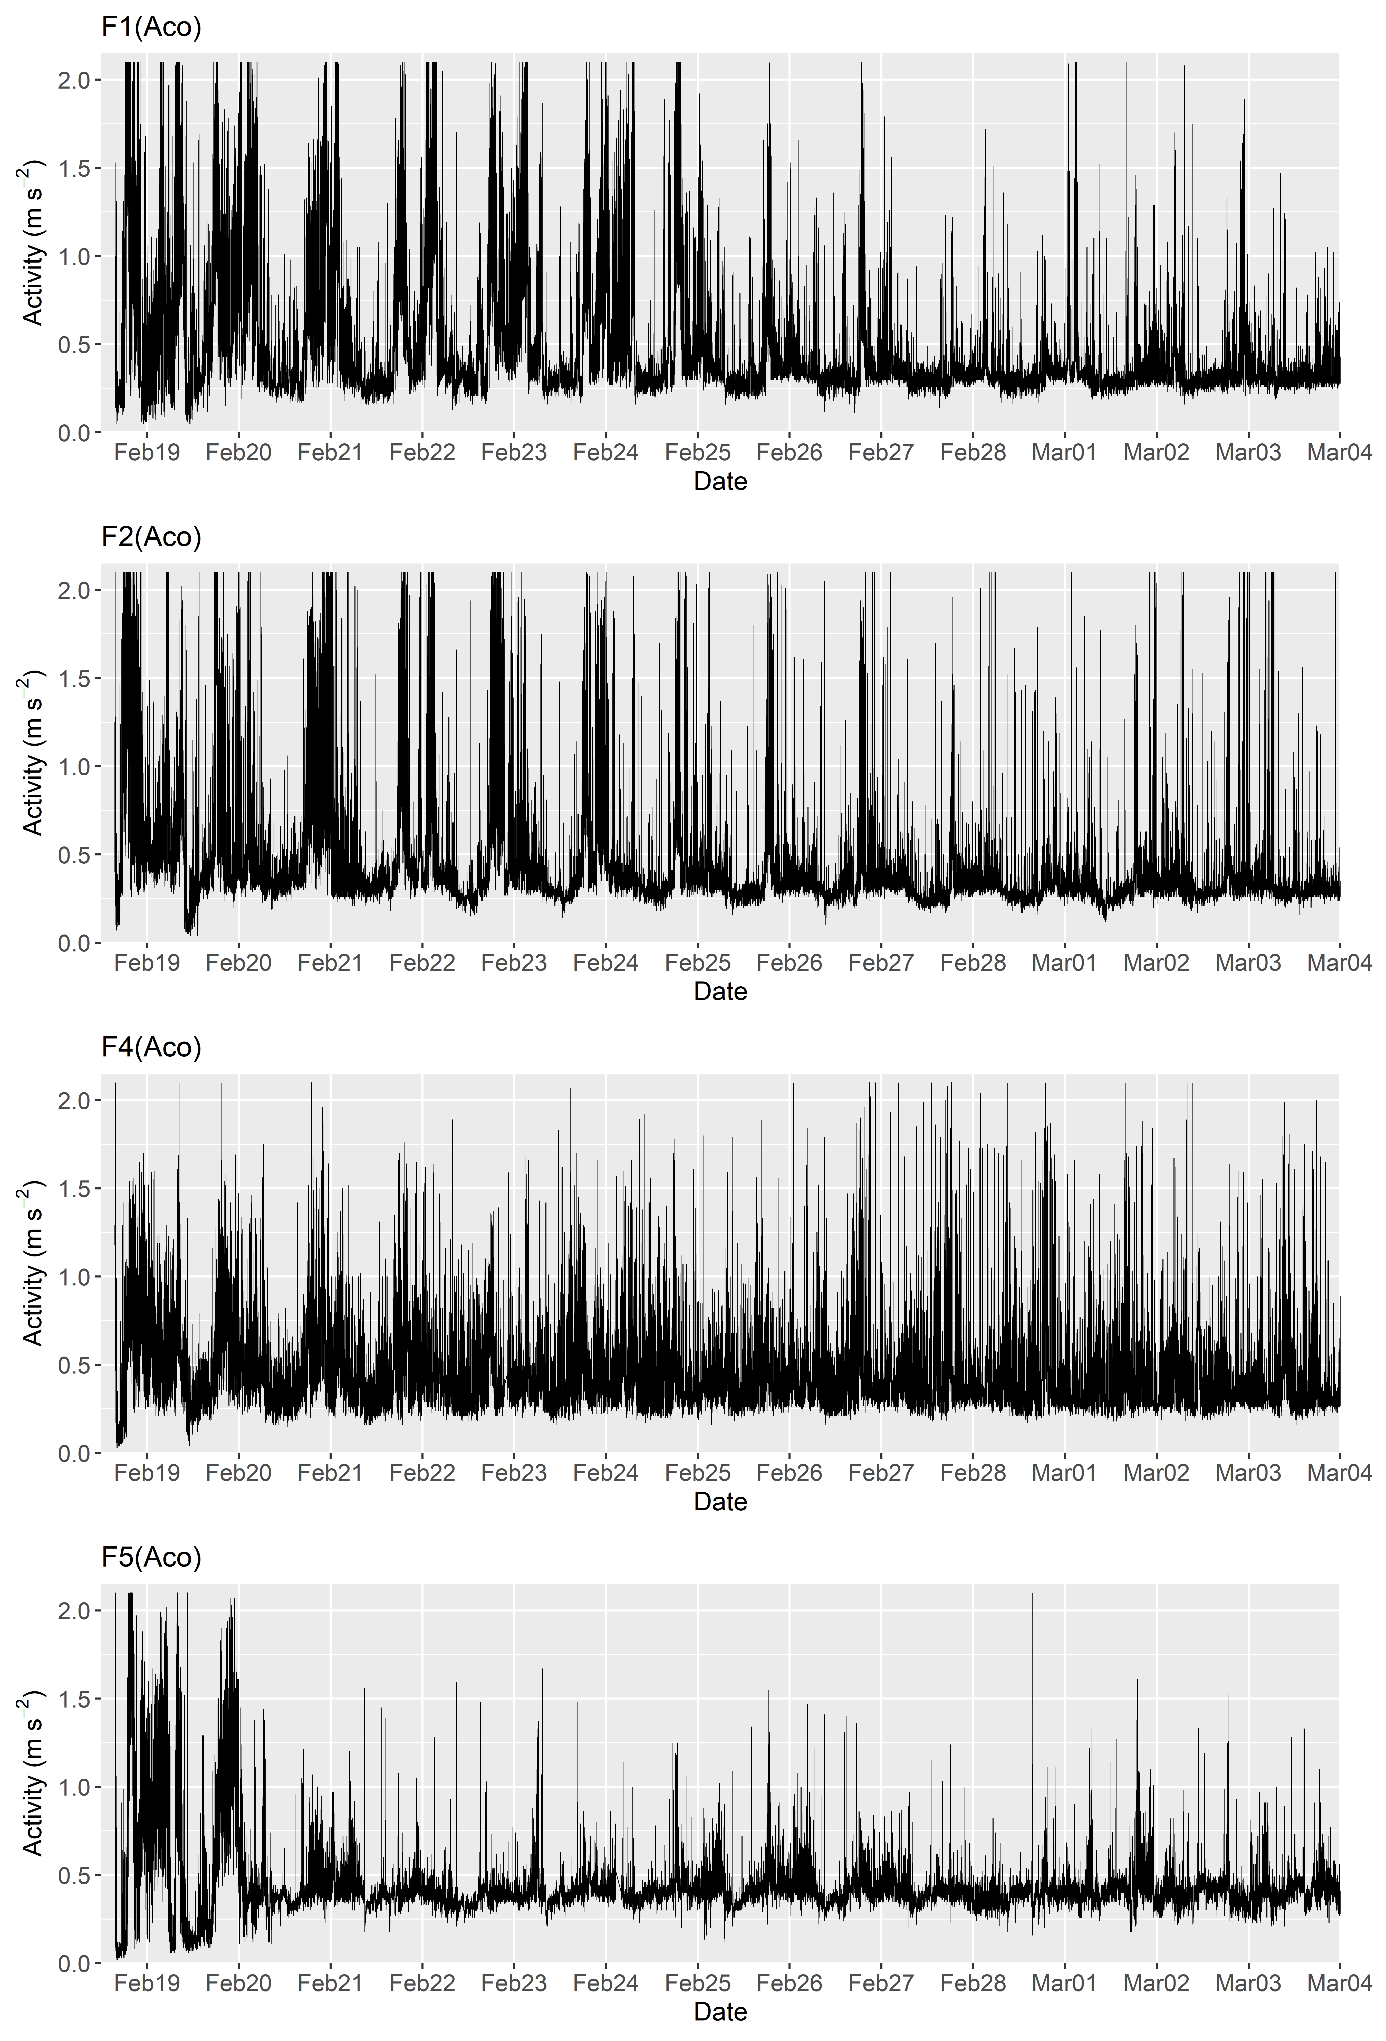


Figure S3: Measured activity for acoustic tags.


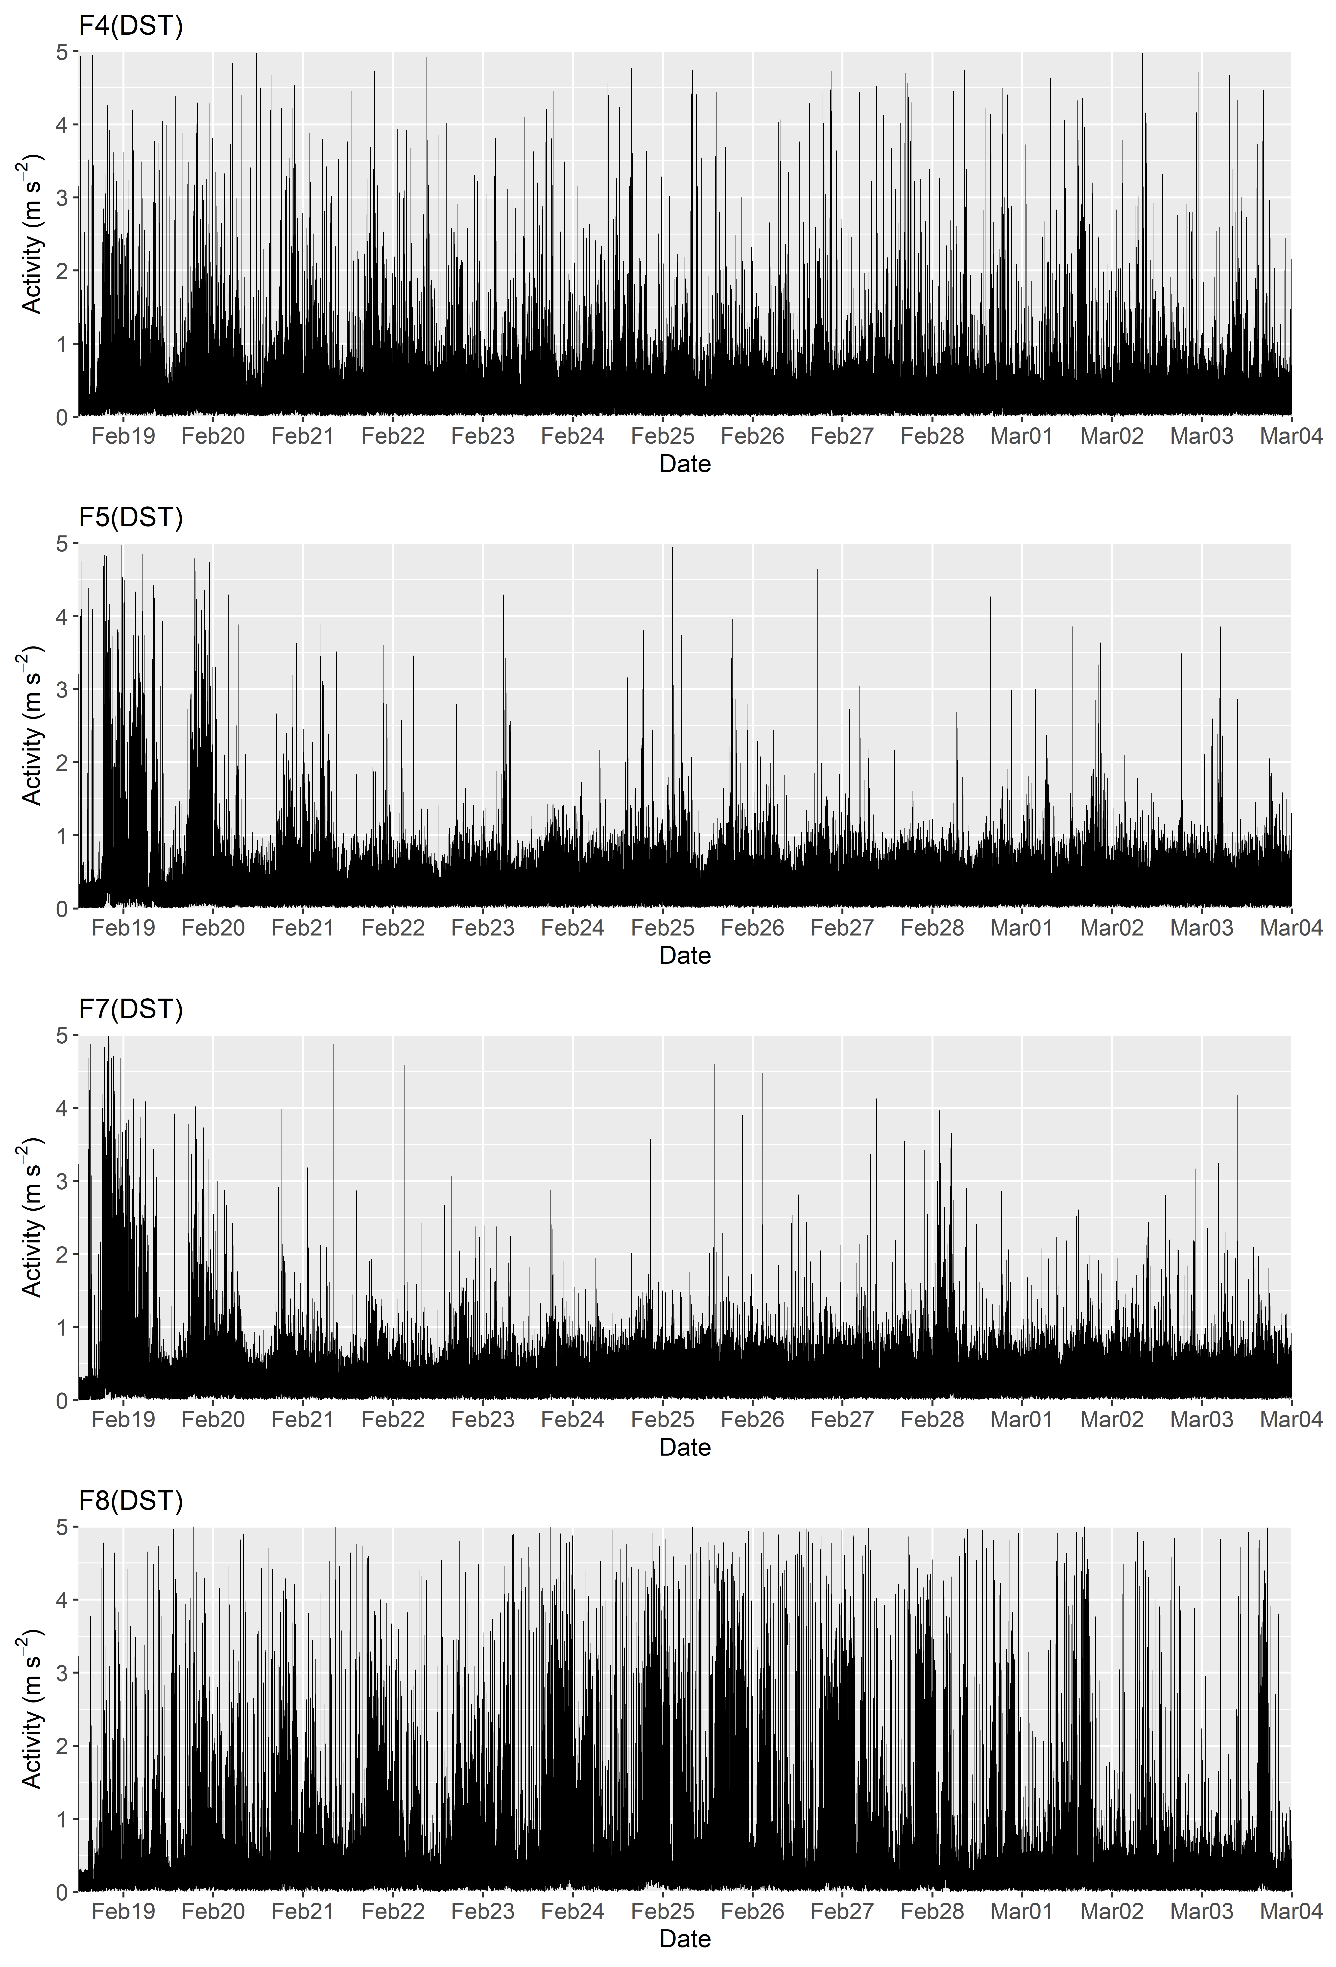


Figure S4: Measured activity for DSTs. The y-axis upper limit has been constrained to 5 m s−2.


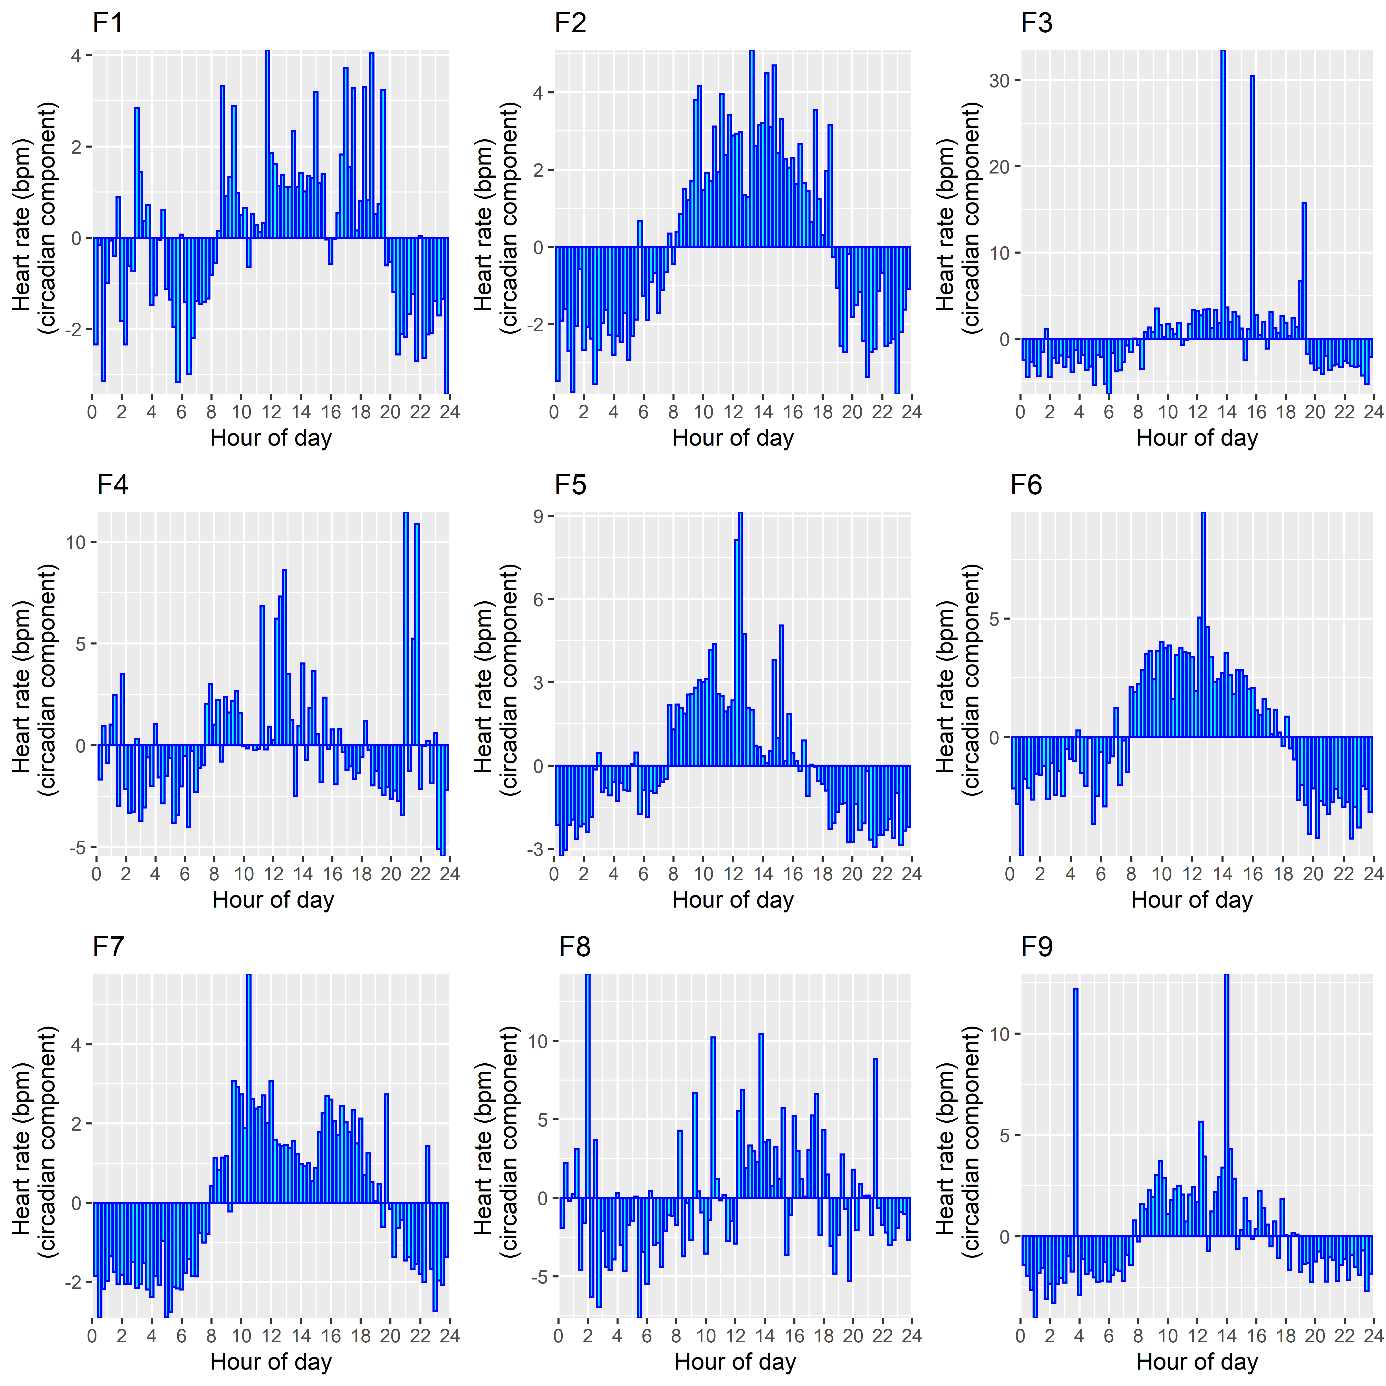


Figure S5. Circadian component of heart rate. Each panel represents data from one individual fish.


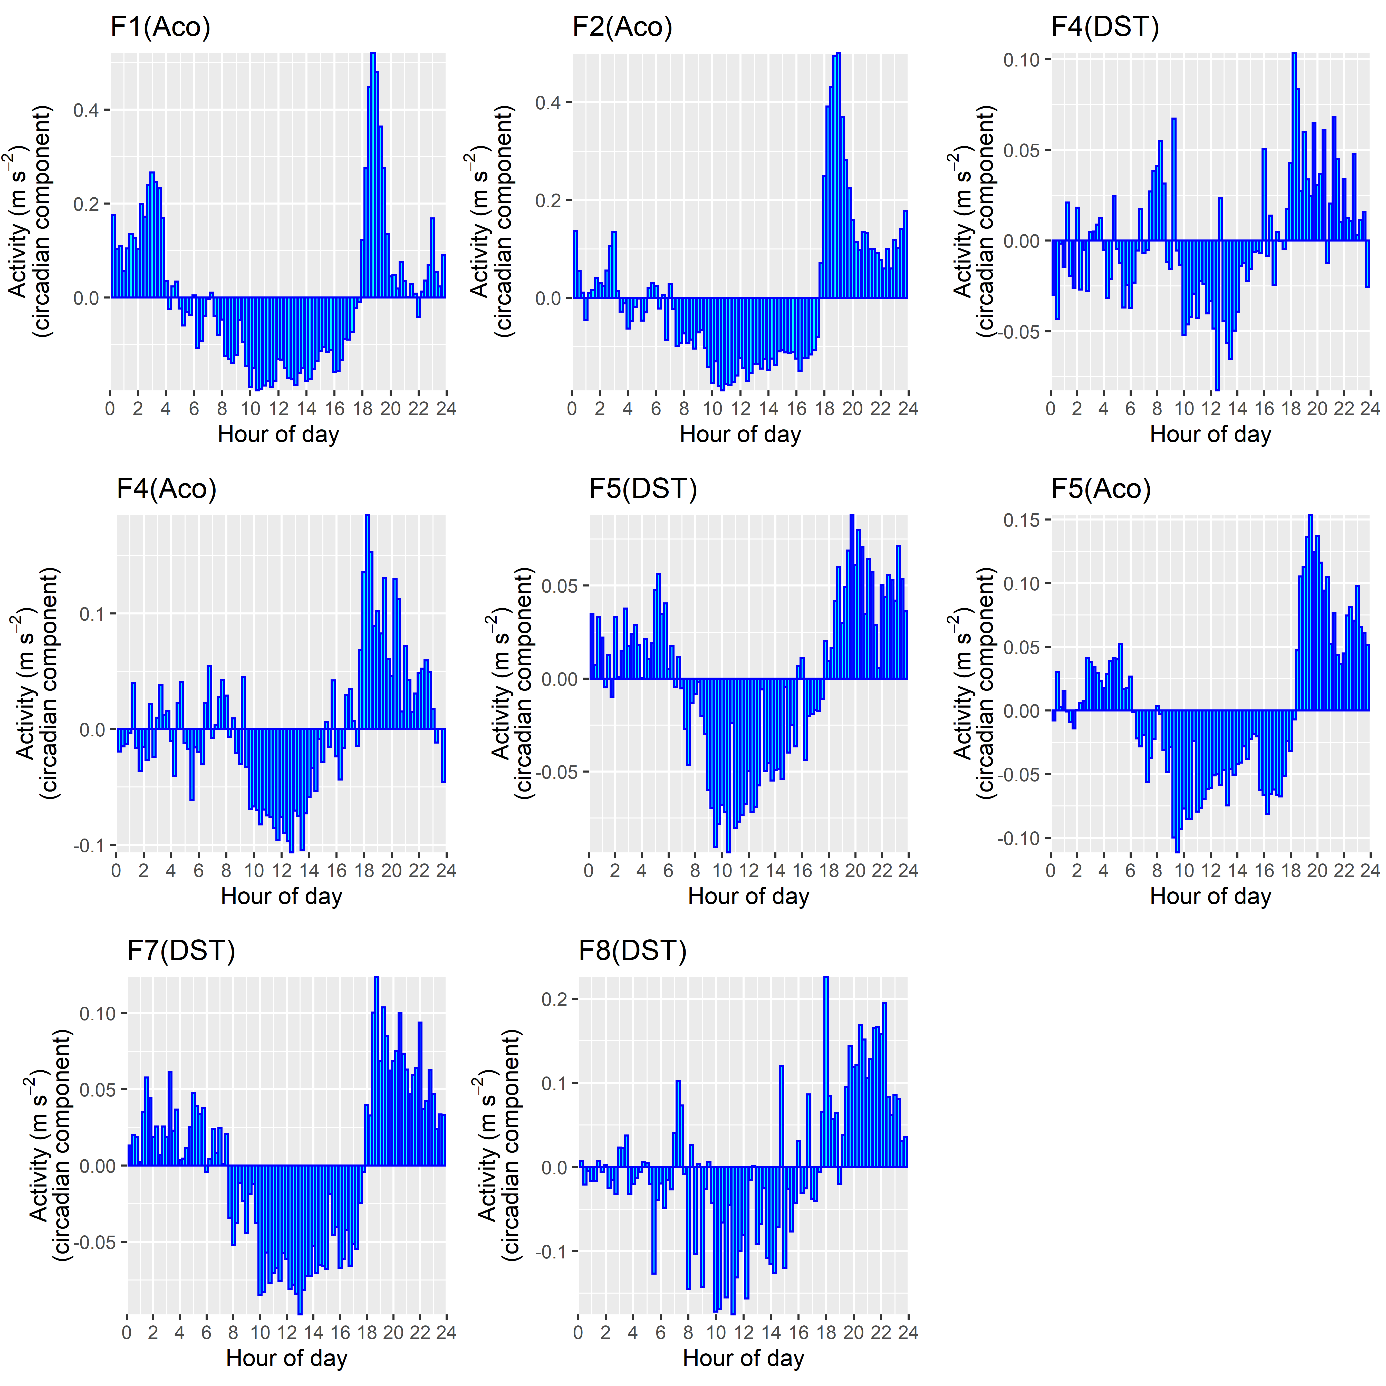


Figure S6. Circadian component of activity. Each panel represents data from one individual fish
